# Supplementary material
Source: PubMed Central journal article supplement (PMC3664855)
Supplement: a21c27b9f0b3d15cf2b10e909793b1f5_genetics.113.150029-2.pdf [file a21c27b9f0b3d15cf2b10e909793b1f5_genetics.113.150029-2.pdf]

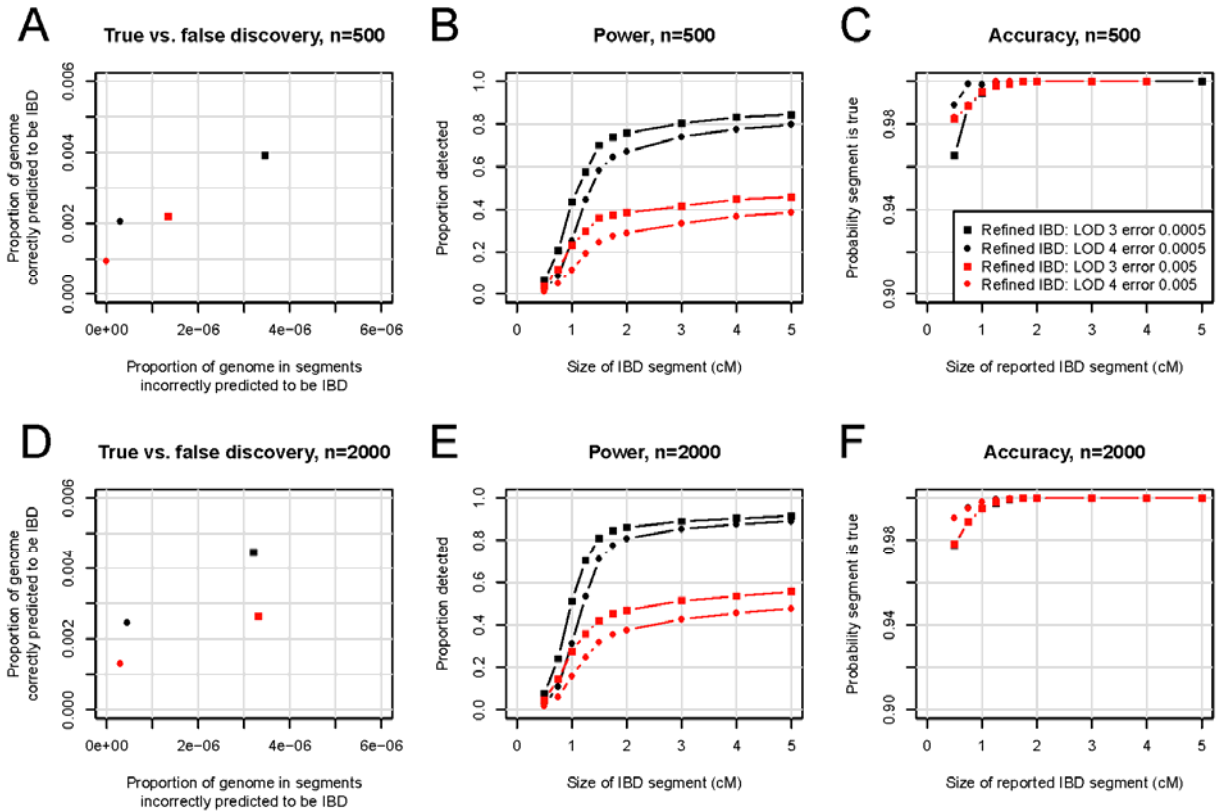

**Figure S2 Effect of genotype error on detection of IBD with Refined IBD.** Genotype error was added at rate 0.0005 (black; results same as those in main text) and 0.005 (red). Parts A-C of the figure are for a sample size of 500 individuals, while parts D-F are for 2000 individuals. Parts A and D show true versus false discovery. False discovery (x-axis) is measured by the average proportion of the genome that, for a pair of individuals, is in detected IBD segments that are determined to be false. Here falsely detected IBD segments are segments for which at most 25% of the detected segment is true IBD as determined from the simulated phase-known sequence data. True discovery (y-axis) is measured by the average proportion of the region that, for a pair of individuals, is in detected IBD that is also true IBD. Any part of a detected IBD segment that is not part of a true IBD segment is not included in this measure. Parts B and E show power to detect IBD as a function of the underlying size of the true IBD segment. The average proportion of the segment that is detected is shown on the y-axis. Undetected segments (proportion 0) are included in this measure. Parts C and F measure the accuracy of detected segments of a given reported size. The y-axis gives the probability that a reported segment is true, which is defined here as the probability that at least 50% of the segment is true IBD.

**Literature Cited**

1. Bacchi ML (2000) The population of Europe. Oxford: Blackwell.
