# Supplementary material
Source: PubMed Central journal article supplement (PMC3664855)
Supplement: c8c9e49bde58500b498c9b1aa4b7947c_genetics.113.150029-3.pdf [file c8c9e49bde58500b498c9b1aa4b7947c_genetics.113.150029-3.pdf]

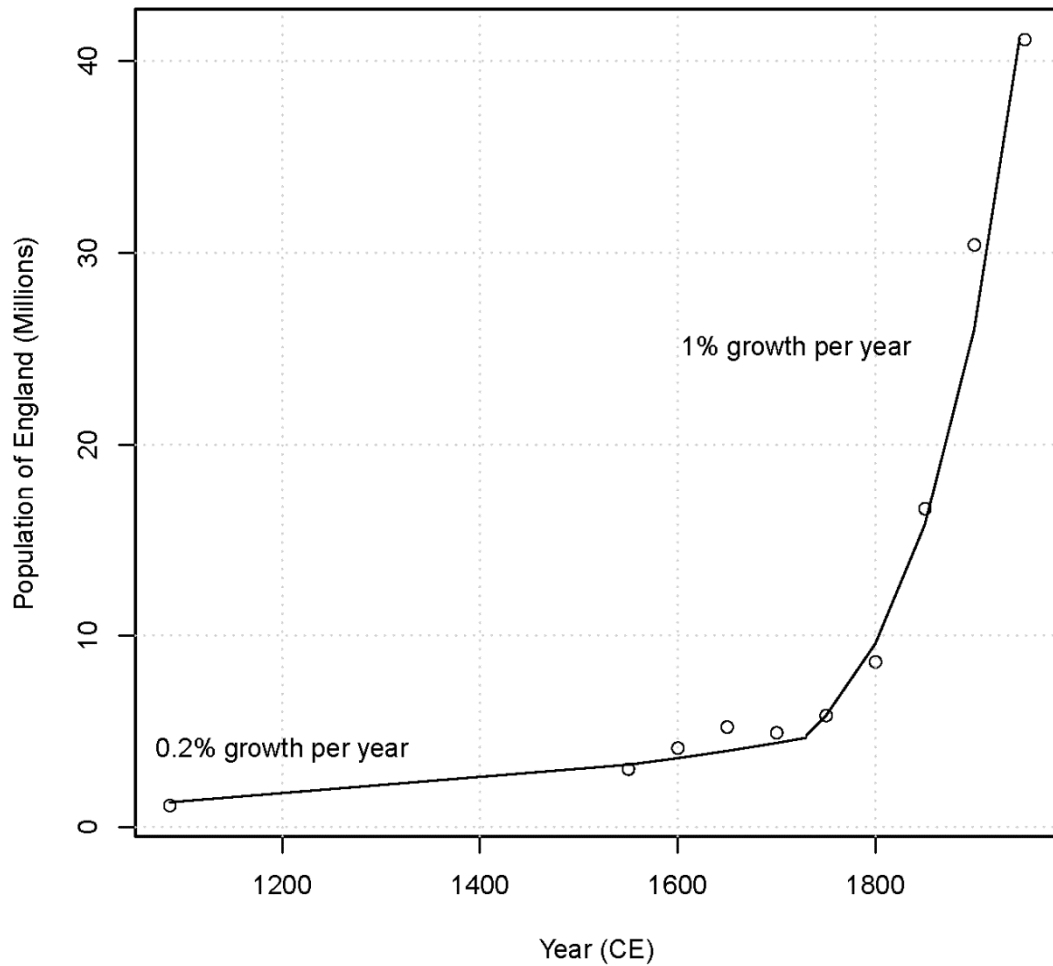

**Figure S1 Recent census population size of England.** Population figures from 1500 to 1900 are from Bacci [1] Table 1.1. Population estimate in 1086 is from the Domesday book, cited in Bacci [1], page 5. Population in 1951 is from the census of England and Wales; census report downloaded from [http://www.visionofbritain.org.uk/text/chap\\_page.jsp?t\\_id=SRC\\_P&c\\_id=3&cpub\\_id=EW1951PRE](http://www.visionofbritain.org.uk/text/chap_page.jsp?t_id=SRC_P&c_id=3&cpub_id=EW1951PRE). The value for Wales from Table C of the report was subtracted from the value for England and Wales to obtain the census value for England. The superimposed lines represent 0.2% growth per year (before 1730) and 1% growth per year (after 1730). Assuming a generation length of 25 years, this corresponds to 25% growth per generation in the 9 generations between 1730 and 1955, and 5% growth per generation in the previous generations.
